# Supplementary material for: Cellular microenvironment controls the nuclear architecture of breast epithelia through β1-integrin
Source: PubMed Central journal article supplement (PMC4943696; doi:10.1080/15384101.2015.1121354), 2016-01-28

**A**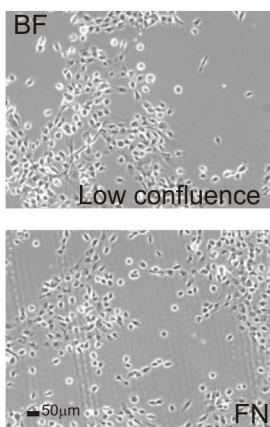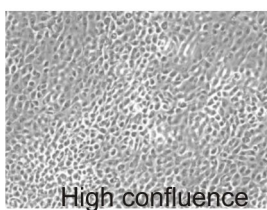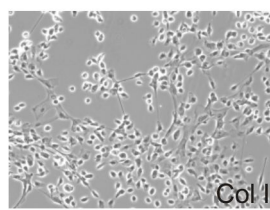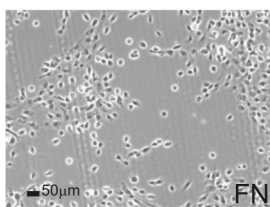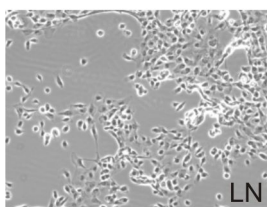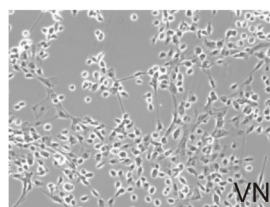**B**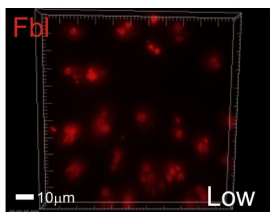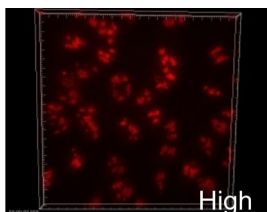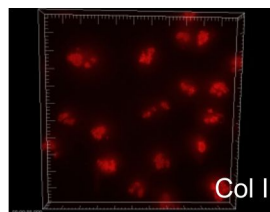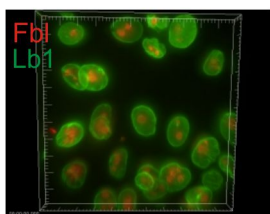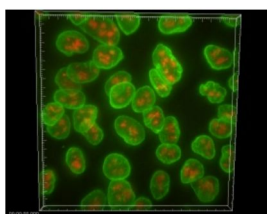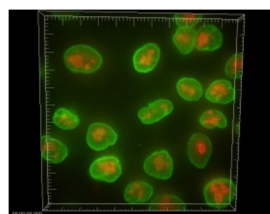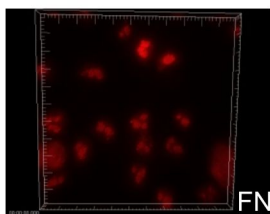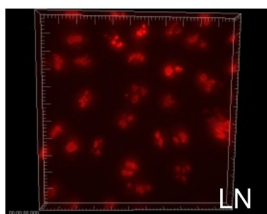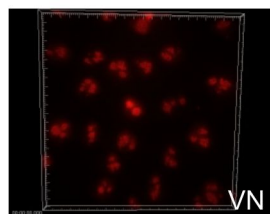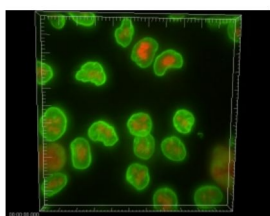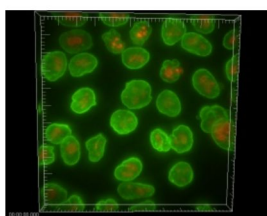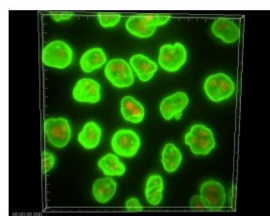**C**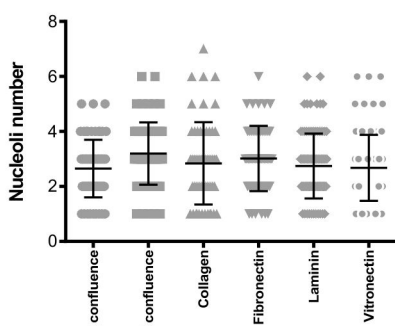**D**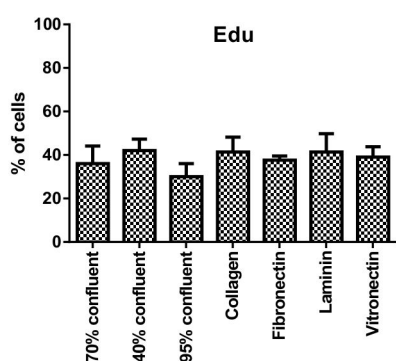

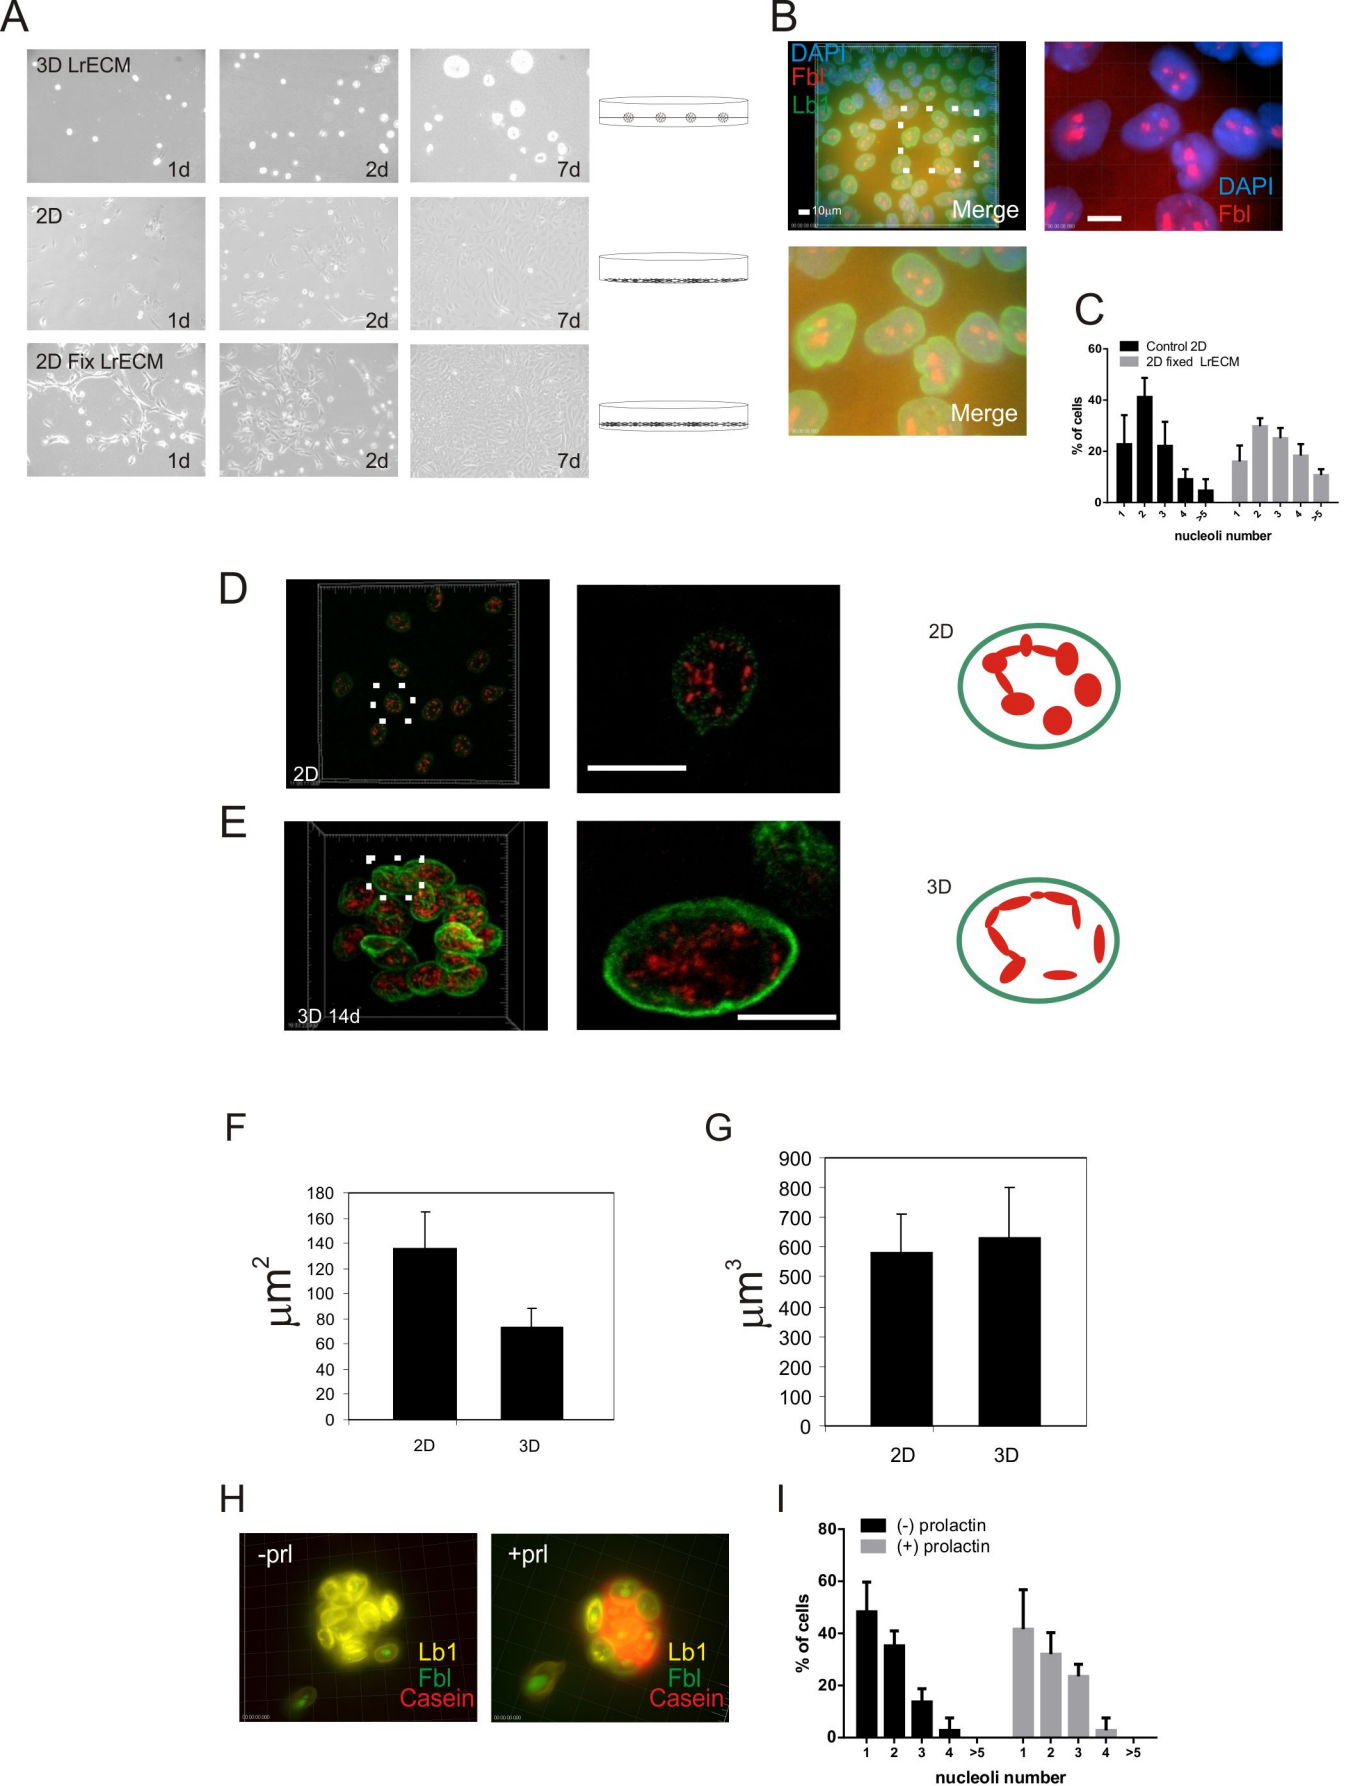

Supplemental figure S2.

A

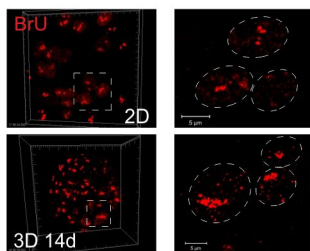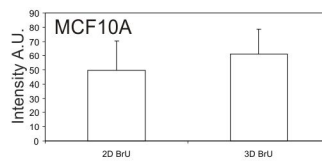

B

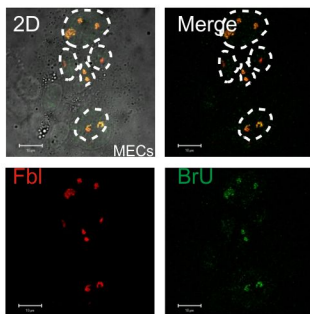

C

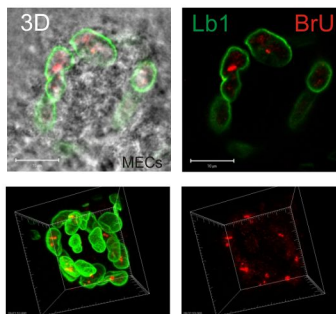

D

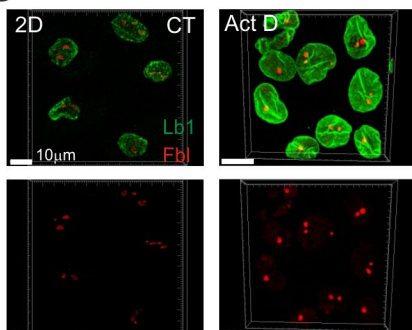

E

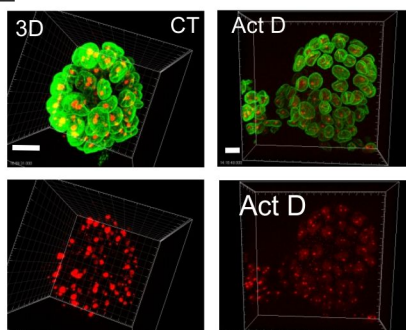

F

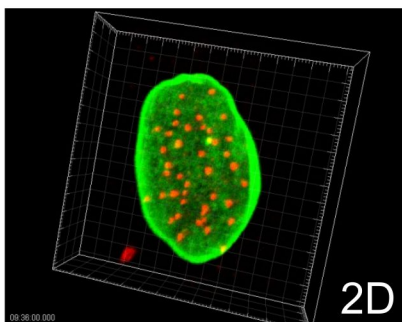

G

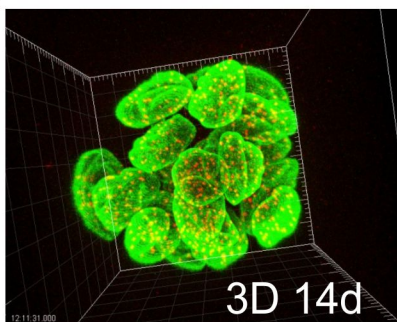

H

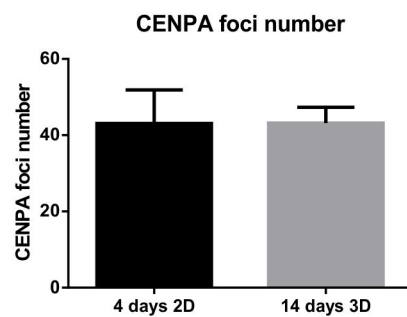

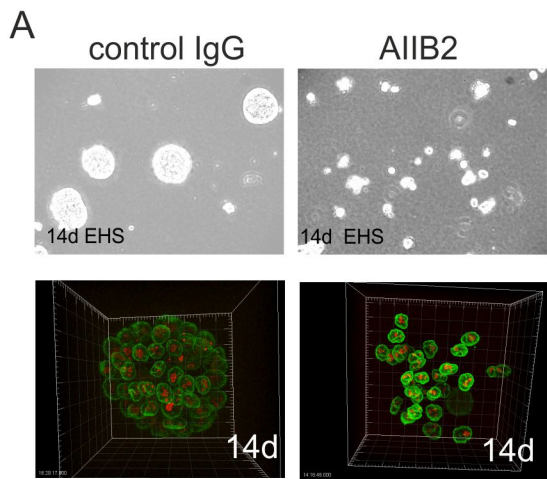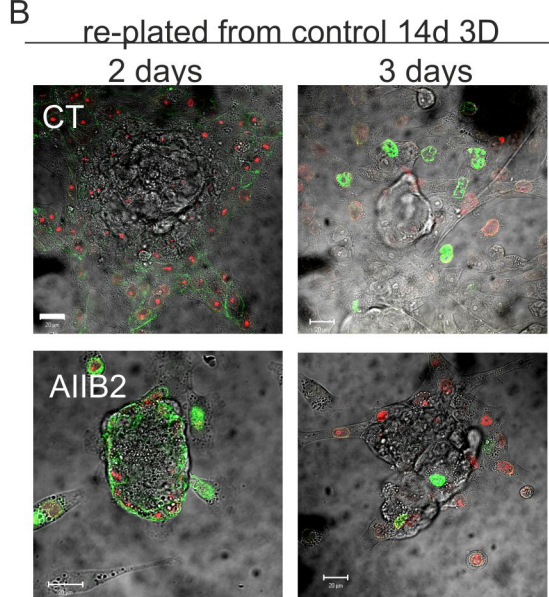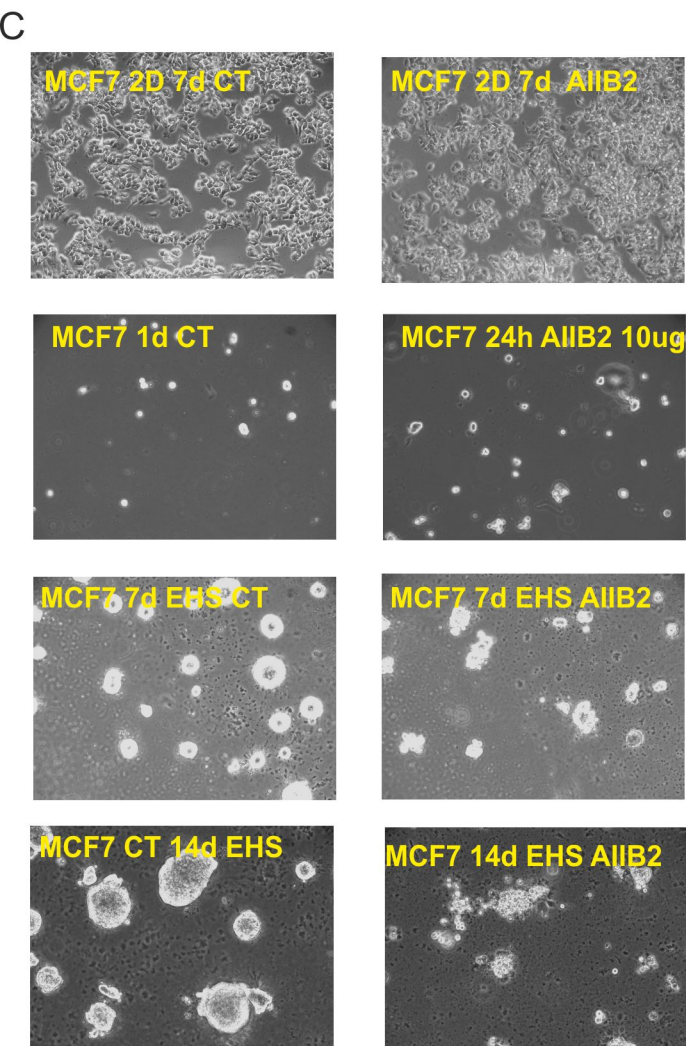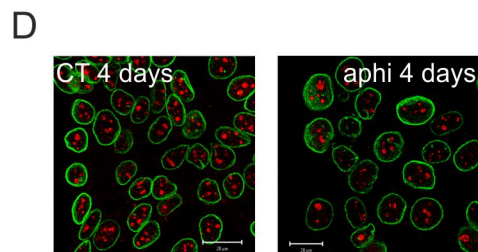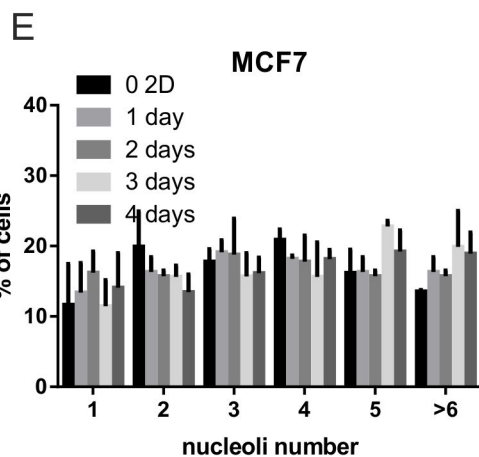

Supplement: kccy-15-03-1121354-s001.pdf [file kccy-15-03-1121354-s001.pdf]
